# Supplementary material
Source: publisher figshare collection journal article supplement (https://gsapubs.figshare.com/ndownloader/files/22757471)
Supplement: Supplementary file 1 [file 22757471]

## **Kinking of the Subducting Slab by Escalator Normal Faulting beneath the North Island of New Zealand**

**Stuart Henrys, Martin Reyners, Ingo Pecher, Stephen Bannister, Yuichi Nishimura, and Guy Maslen**

### **1.0 Multichannel Seismic Processing**

Table DR1: Multi-channel seismic reprocessing sequence for NIGHT line.

| <b>PROCESSING STEPS</b>                                                 | <b>COMMENTS</b>                                                                                                                                                                                                                                                                                                  |
|-------------------------------------------------------------------------|------------------------------------------------------------------------------------------------------------------------------------------------------------------------------------------------------------------------------------------------------------------------------------------------------------------|
| <b>Reformat SEGY data</b>                                               | Anti-alias filter: minimum phase high cut butterworth : 80Hz-90Hz. Resample to 4 ms sample interval                                                                                                                                                                                                              |
| <b>Trace editing</b>                                                    | Interactive QC to locate noise and amplitude spikes                                                                                                                                                                                                                                                              |
| <b>Amplitude recovery</b>                                               | Linear gain based on RMS window-based scaling                                                                                                                                                                                                                                                                    |
| <b>Swell noise filter</b>                                               | 400 ms minimum phase trapezium butterworth: 3-6-80-90 Hz, 8.33 ms/trace FK-filter with a 500ms median AGC wrap                                                                                                                                                                                                   |
| <b>Trace decimation</b>                                                 | 25m bins with spatial anti-alias filter: minimum phase low cut butterworth: 50-60 Hz. Resample to 8 ms sample interval                                                                                                                                                                                           |
| <b>Gap deconvolution</b>                                                | Operator length 350 ms, gap is 32 ms, design window is water bottom + 500 ms to water bottom + 3000 ms                                                                                                                                                                                                           |
| <b>Sort to CDP</b>                                                      |                                                                                                                                                                                                                                                                                                                  |
| <b>Correction for cross-line-offset</b>                                 | The acquisition geometry included a cross-line source-streamer offset of some 130 metres, with the in-line offset of 173 metres. The data was binned to CDP's assuming a simple 2D in-line offset distribution, and then the true (geometric) offset calculated and a bin-centring correction in the NMO domain. |
| <b>Static correction</b>                                                | Recording lag plus source/streamer difference: -57 ms                                                                                                                                                                                                                                                            |
| <b>First pass radon demultiple using picked multiple velocity field</b> | 120-fold, 4xcdp combined super-gathers<br>Transform range: -1300 ms to +300 ms far-offset moveout<br>Remove multiple range: -200 ms to +200 ms far-offset                                                                                                                                                        |

|                                                                                 |                                                                                                                                                                                                                                     |
|---------------------------------------------------------------------------------|-------------------------------------------------------------------------------------------------------------------------------------------------------------------------------------------------------------------------------------|
|                                                                                 | moveout<br>200 slowness-values used; application from 1.5 times<br>water bottom                                                                                                                                                     |
| <b>Remove NMO correction</b>                                                    |                                                                                                                                                                                                                                     |
| <b>Velocity analysis</b>                                                        | Pick velocity from semblance gathers derived from<br>every 240 <sup>th</sup> CDP                                                                                                                                                    |
| <b>Second pass radon demultiple<br/>using 90% of primary velocity<br/>field</b> |                                                                                                                                                                                                                                     |
| <b>Residual FK Demultiple</b>                                                   |                                                                                                                                                                                                                                     |
| <b>NMO Correction and water-<br/>bottom tied inner/outer trace<br/>mutes</b>    |                                                                                                                                                                                                                                     |
| <b>Export traces to Paradigm's<br/>GeoDepth™ software</b>                       | Data are exported for pre-stack depth migration                                                                                                                                                                                     |
| <b>Stack</b>                                                                    |                                                                                                                                                                                                                                     |
| <b>Post-Stack Processing</b>                                                    | A post-stack gap-deconvolution was tested, to suppress<br>any residual peg-leg or water bottom multiple,<br>particularly in water depths of under 400ms where the<br>parabolic Radon demultiple approach used can be<br>ineffective |
| <b>Migration</b>                                                                |                                                                                                                                                                                                                                     |
| <b>Output to SEG Y and display</b>                                              |                                                                                                                                                                                                                                     |

Uninterpreted processed NIGHT seismic profile is shown in Fig. DR1A.

## ***2.0 Pre-stack Depth Migration***

In pre-stack depth migration no assumption is made about the location of reflectors and therefore, the migrated image gives an independent check on the geometry of the plate interface. Pre-stack depth migration was undertaken using Paradigm's GeoDepth™ software. We used a macro-velocity layer approach to building an initial velocity model for depth imaging. Subsequent velocity models are updated as a result of residual-moveout analysis (RMO), performed on common-depth-point (CDP) or common-reflection-point (CRP) gathers around reflection events corresponding to the macro-velocity layer boundaries. In RMO analysis, the residual travel-time curvature of an event, after it has been corrected with the current model, is used as the basis for updating the model

The initial velocity model for pre-stack depth migration was derived from ray tracing of wide-angle data (Zelt and Smith, 1992) using records from the six digital OBSs and five onshore-offshore stations (Henry et al., 2003a). The model was modified to account for normal-incidence reflection times observed in the reflection data. Also in the vicinity of the NIGHT line are two oil exploration wells (Barnes et al., 2002); Hawke Bay-1 (BP Shell Aquitaine Todd Petroleum Developments Ltd, 1976) which cored Paleogene and Neogene strata and had a usable sonic log between 600 ms and 1700 ms TWT, and Opoutama-1 which intersected Cretaceous rocks but for which no sonic data was available. Therefore, along the NIGHT profile conventional stacking velocity analysis was used to constrain the initial velocity model. Stacking velocities were obtained at 125 m intervals for the seabed and six sedimentary layers, including a layer representing Cretaceous and older rocks. Interval velocities for these layers were converted to depth using image ray map migration and a vertical velocity gradient of 0.6 m/s per metre was assigned to each layer with zero velocity gradient below the deepest horizon.

After RMO iterative velocity model updates the final model resulted in eight layers were defined. The upper four layers retained the original 0.6 m/s per metre vertical velocity gradient, with 0.3 m/s per metre being employed for the deeper layers. Below the Top Cretaceous event, there are few clear reflectors and only layers down to approximately 10 km depth could be update through residual moveout analysis. Beneath 10 km depth the initial wide-angle velocity model was retained and used in the pre-stack depth migration.

The processed pre-stack migrated seismic data are shown in Fig. DR1B

### **3.0 Thermal Modeling**

We have modeled the thermal regime at Hawke Bay-1 (see Fig. 1 for location) using a one-dimensional finite-element method. Basal heat flow is defined at the plate interface and models are limited to considering only the upper plate. The crustal thickness beneath Hawke Bay-1 is taken to be 17 km from Figure 3. To avoid the effect of temperature perturbations at the plate interface we have only modeled the temperature gradient to 15 km depth. Prior to subduction a basal heat flow of 43 mWm<sup>-2</sup> is used which is consistent with expected surface heat flow from Cretaceous age (Mortimer and Parkinson, 1996) Pacific Plate (Turcotte and Schubert, 2002), that is, conductive heat flow from the top of the descending slab pre-subduction. Modeled heat productivity within the upper plate contributes 17 mWm<sup>-2</sup>, hence the pre-sedimentation surface heat flow is 60 mWm<sup>-2</sup>; a value that is corroborated from BSR derived heat flow at the trench (Henrys et al., 2003b). Since 20 – 25 Ma, the approximate start of subduction (Ballance, 1976), the modeled basal heat flow is varied to fit corrected bore hole temperature data in Hawke Bay-1 using the thermal and physical property parameters given in Figure DR2. The modelling requires the basal heat flow to have decreased to 27-30 mWm<sup>-2</sup> since 25 Ma due to cooling associated with the subducting Pacific Plate. We have not completed a full sensitivity analysis but a combination of varying conductivity, specific heat capacity, and heat flow gives an estimate of upper and lower limit temperatures at the base of the crust below Hawke Bay-1 at 250°C and 200°C respectively.

## **References**

- Ballance, P.F., 1976, Evolution of the Upper Cenozoic magmatic arc and plate boundary in northern New Zealand: *Earth and Planetary Science Letters*, v. 28, 356-370.
- Barnes, P.M., Nicol, A., and Harrison, T., 2002, Late Cenozoic evolution and earthquake potential of an active listric thrust complex above the Hikurangi subduction zone, New Zealand: *Geol. Soc. Am. Bull.*, v. 114, 1379-1405.
- BP Shell Aquitaine Todd Petroleum Developments Ltd, 1976, Well completion report Hawke Bay-1, New Zealand Ministry of Commerce, Open-File Petroleum Report 667, p. 159.
- Funnell, R.H., Chapman, D., Allis, R.G., and Armstrong, P., 1996, Thermal state of the Taranaki Basin, New Zealand: *Journal of geophysical research*, v. 101(B11), 25197-25215.
- Henry, S., Reyners, M., and Bibby, H., 2003a, Exploring the plate boundary structure of the North Island of New Zealand: *Eos Transactions American Geophysical Union*, v. 84, no. 31, p. 289, 294-295.
- Henry, S.A., Ellis, S., and Uruski, C., 2003b, Conductive heat flow variations from bottom-simulating reflectors on the Hikurangi margin, New Zealand: *Geophys. Res. Lett.*, v. 30, 1065-1068.
- Mortimer, N., and Parkinson, D., 1996, Hikurangi Plateau: a Cretaceous large igneous province in the southwest Pacific Ocean: *Journal of Geophysical Research*, v. 101, 687-696.
- Turcotte, D.L., and Schubert, G., 2002, *Geodynamics*: Cambridge, UK, Cambridge University Press, 456 p.
- Zelt, C.A., and Smith, R.B., 1992, Seismic traveltime inversion for 2-D crustal velocity structure: *Geophysical Journal International*, v. 108, 16-34.

Figure DR1. (A) Uninterpreted time-migrated stack of offshore NIGHT multi-channel seismic line.  
(B) Pre-stack depth migration for part of the NIGHT seismic reflection line.

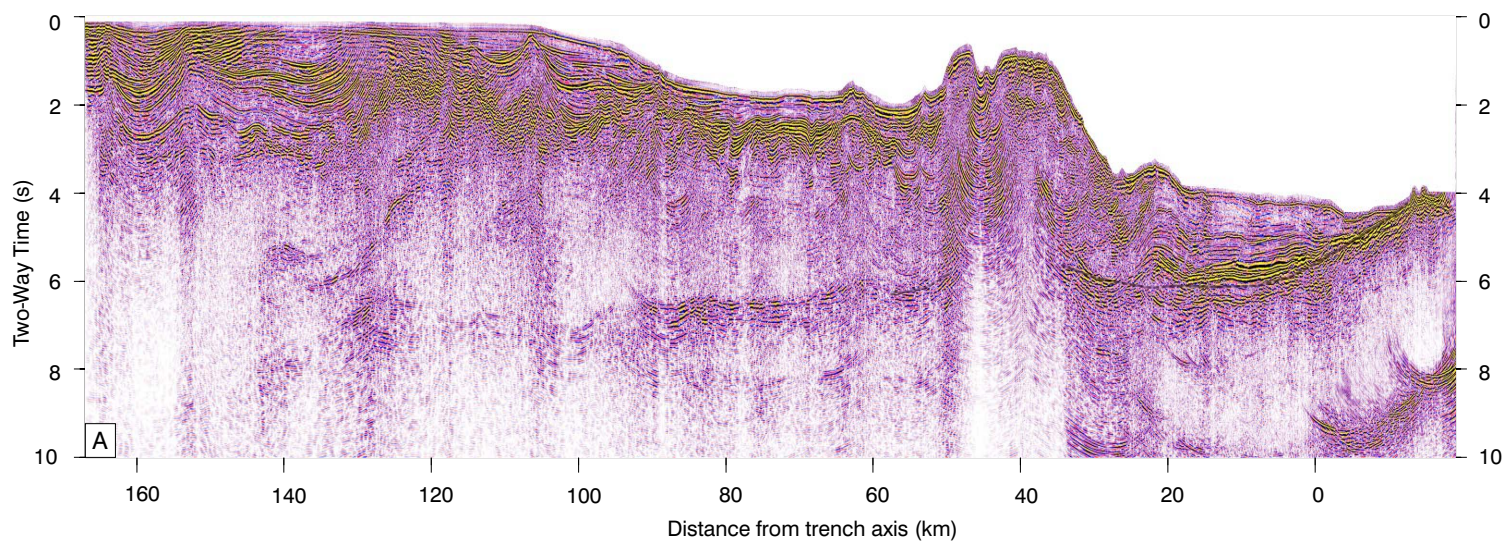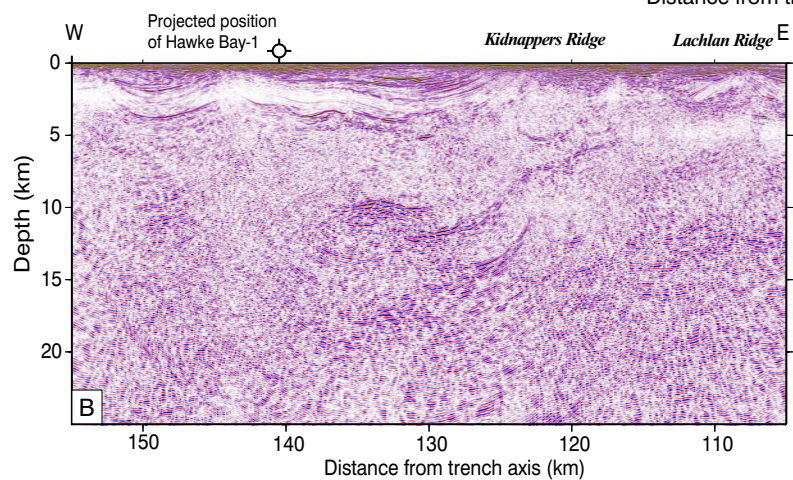

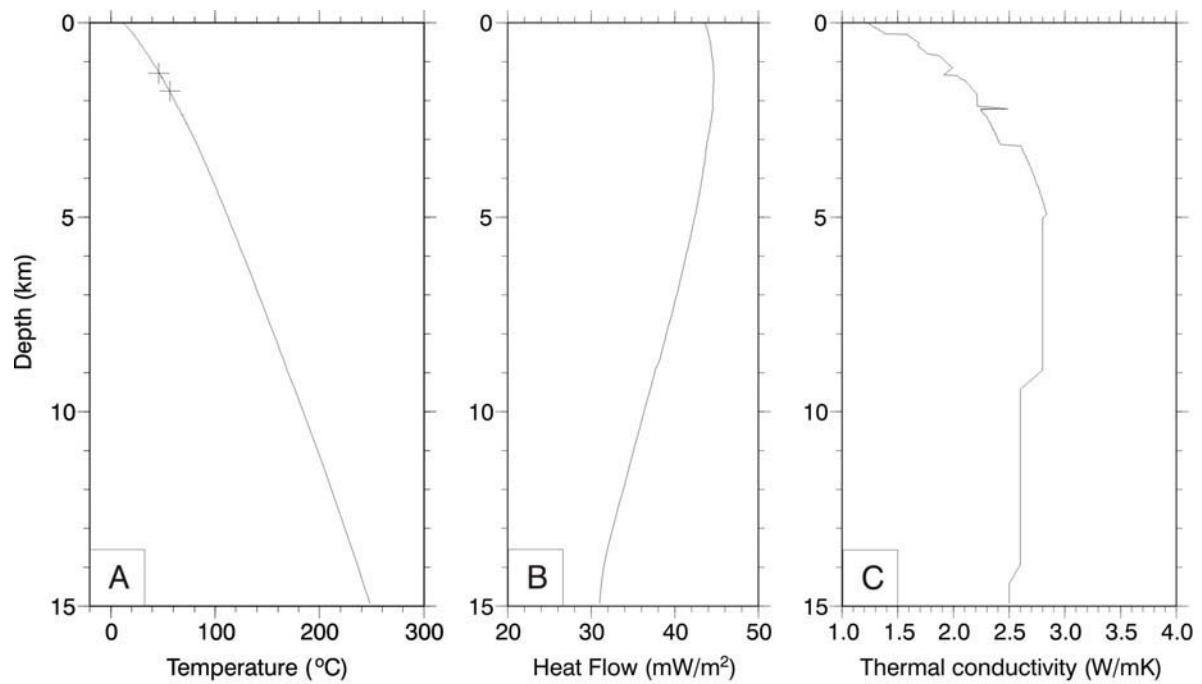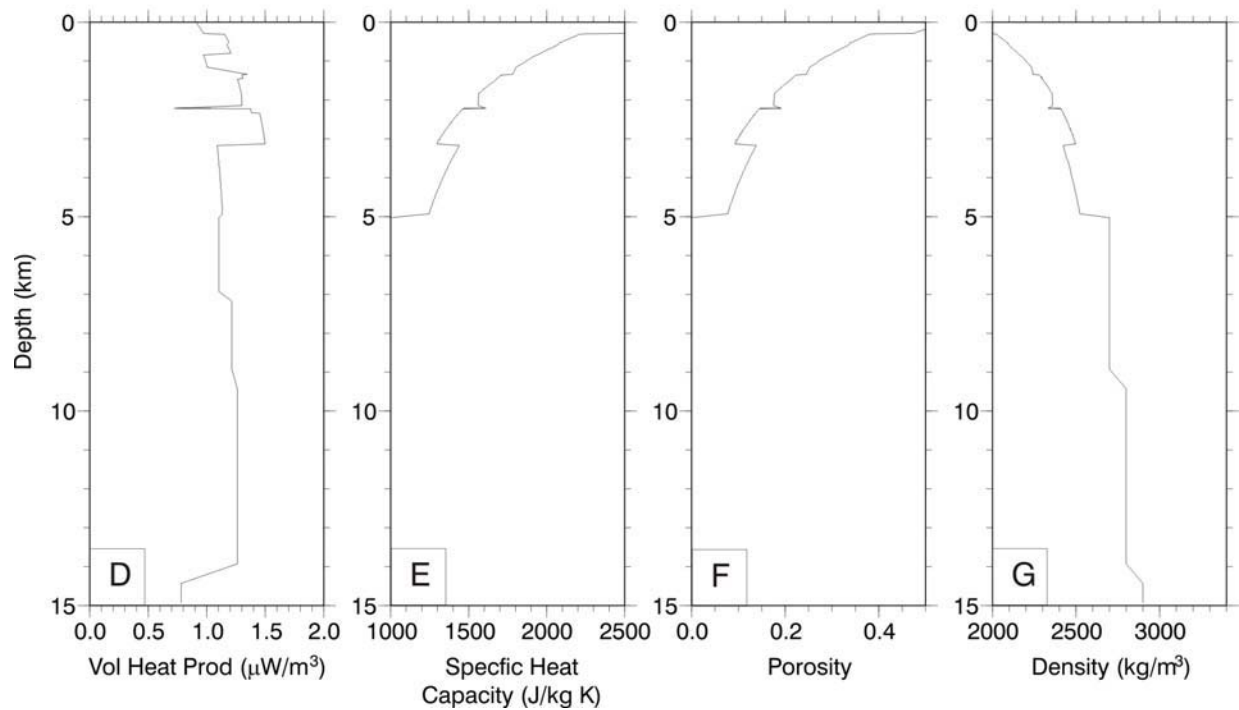

Figure DR2. Depth distribution of (A) measured, shown with plus symbol, and modelled temperature curve in Hawke Bay-1 using thermal and physical property measurements (B-G) derived from a compilation of well log data for Hawke Bay-1 (BP Shell Aquitaine Todd Petroleum Developments Ltd, 1976) and from New Zealand sedimentary basins (Funnell et al., 1996).
